# Supplementary material for: Morphology-engineered α-MoO 3 nanostructures via MoS 2 transformation for high-performance supercapacitors
Source: Royal Society of Chemistry journal article supplement (doi:10.1039/d5ma01084e), 2025-12-11
Supplement: d5ma01084e1.pdf [file d5ma01084e1.pdf]

## Supplementary information

### Morphology-Engineered $\alpha$ -MoO<sub>3</sub> Nanostructures via MoS<sub>2</sub> Transformation for High-Performance Supercapacitors

Ahmed A.R. Abdel-Aty<sup>a</sup>, Mohammed Mosaad Awad<sup>a</sup>, Olfa Kanoun<sup>b</sup>, Ahmed S.G. Khalil<sup>c,d\*</sup>

<sup>a</sup> Institute of Basic and Applied Science, Egypt-Japan University of Science and Technology (E-JUST), 179 New Borg El-Arab City, Alexandria, Egypt

<sup>b</sup> Professorship of Measurement and Sensor Technology, Chemnitz University of Technology, Reichenhainer Str. 70, 09126 Chemnitz, Germany

<sup>c</sup> Environmental and Smart Technology Group, Faculty of Science, Fayoum University, 63514, Fayoum, Egypt.

<sup>d</sup> EvoSmarTec GmbH, Alfredstr. 81, 45130 Essen, Germany

\* Corresponding author: Prof. Ahmed S.G. Khalil, E-mail: [asg05@fayoum.edu.eg](mailto:asg05@fayoum.edu.eg)

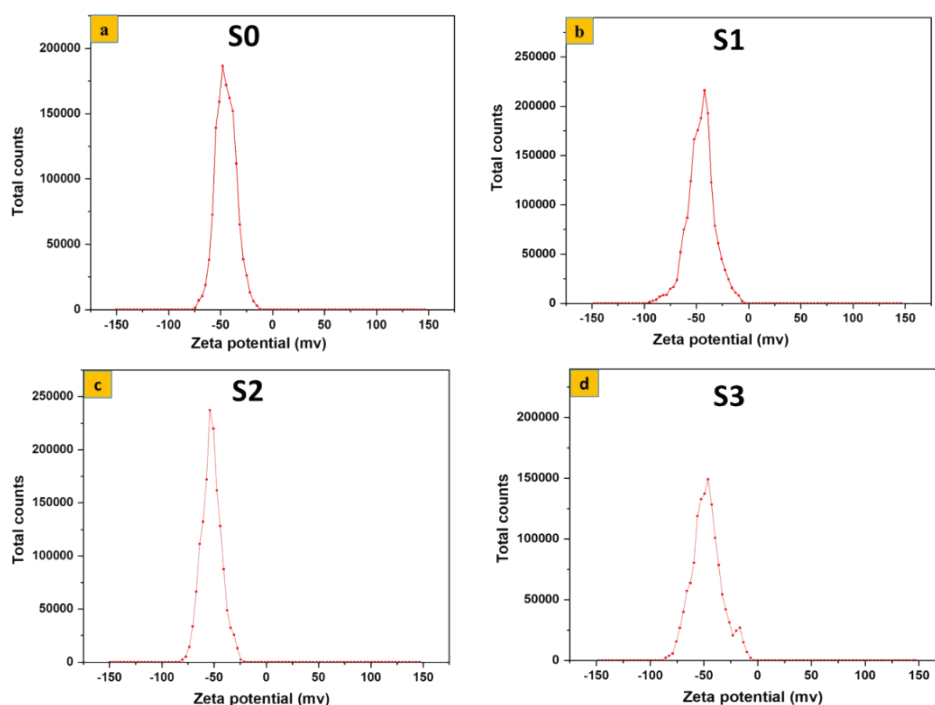

**Fig. S1.** Zeta potential profile of synthesized S0, S1, S2, and S3.

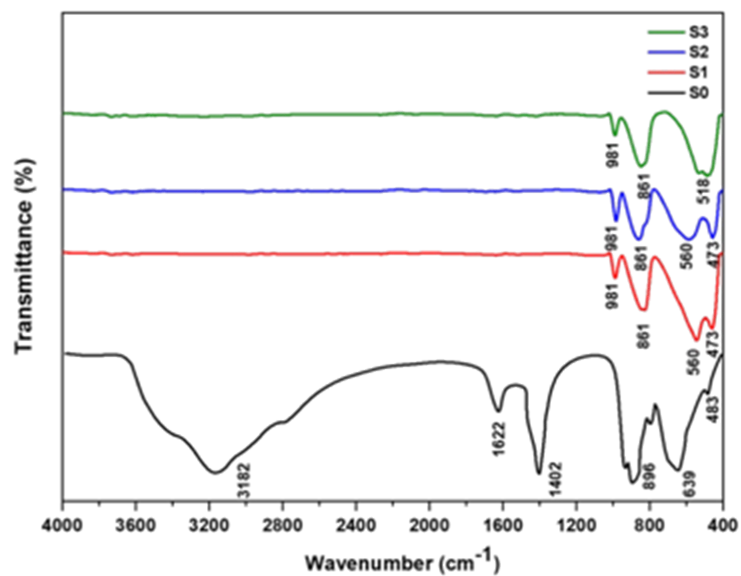

**Fig.S2.** ATR-IR spectra of synthesized S0, S1, S2, and S3.

**Table S1:** Surface area, pore diameter and pore volume of the adsorbents.

| Sample | $S_{\text{BET}}$ ( $\text{m}^2\text{g}^{-1}$ ) | Pore Volume ( $\text{cm}^3 \text{g}^{-1}$ ) | Pore diameter (nm) |
|--------|------------------------------------------------|---------------------------------------------|--------------------|
| S0     | 10.44                                          | 0.035                                       | 19.75              |
| S1     | 14.39                                          | 0.0967                                      | 27.55              |
| S2     | 3.23                                           | 0.036                                       | 9.36               |
| S3     | 12.34                                          | 0.071                                       | 22.59              |

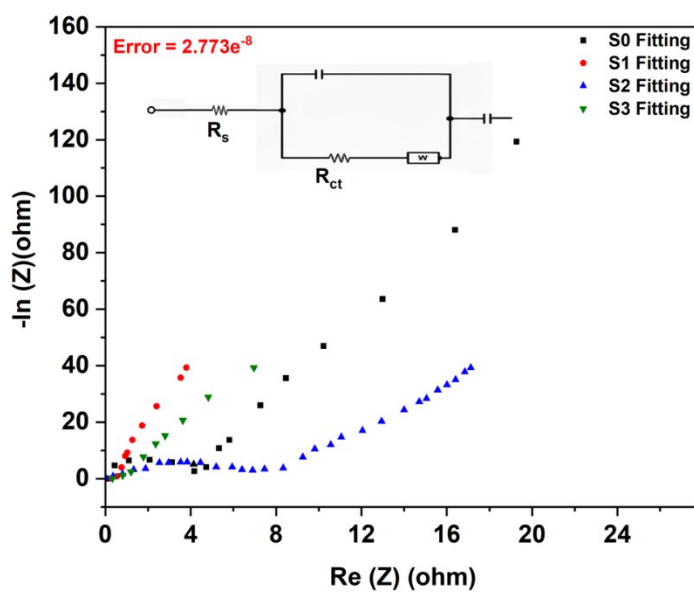

**Fig.S3.** EIS fitting for S0-S3

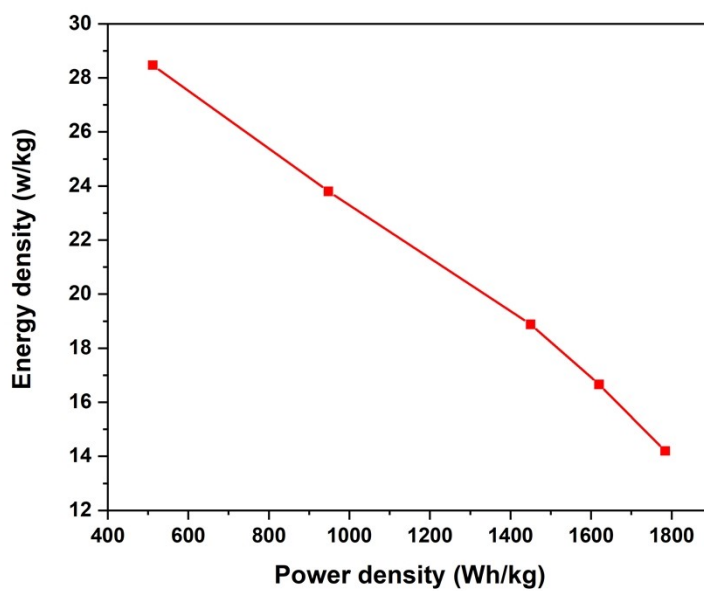

**Fig.S4.** IR Ragone plot for MoO<sub>3</sub>-S1 at different current density

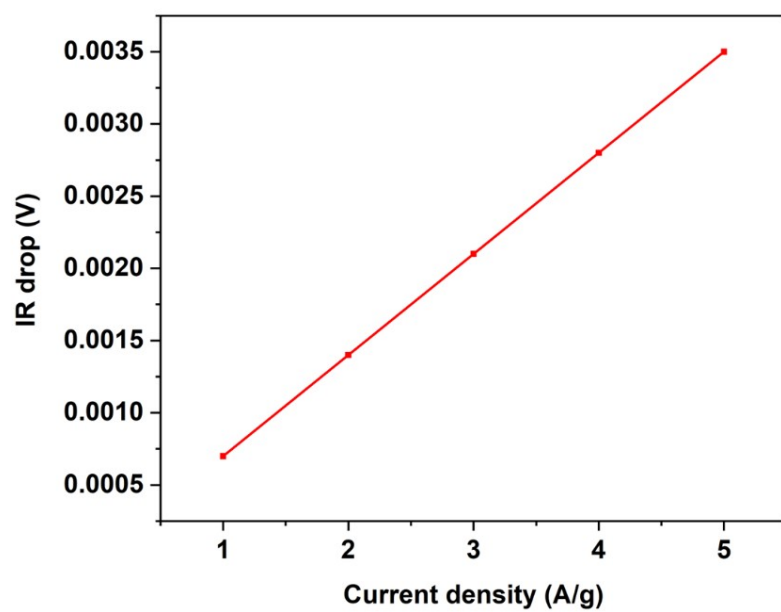

**Fig.S5.** IR drop for MoO<sub>3</sub>-S1 at different current density

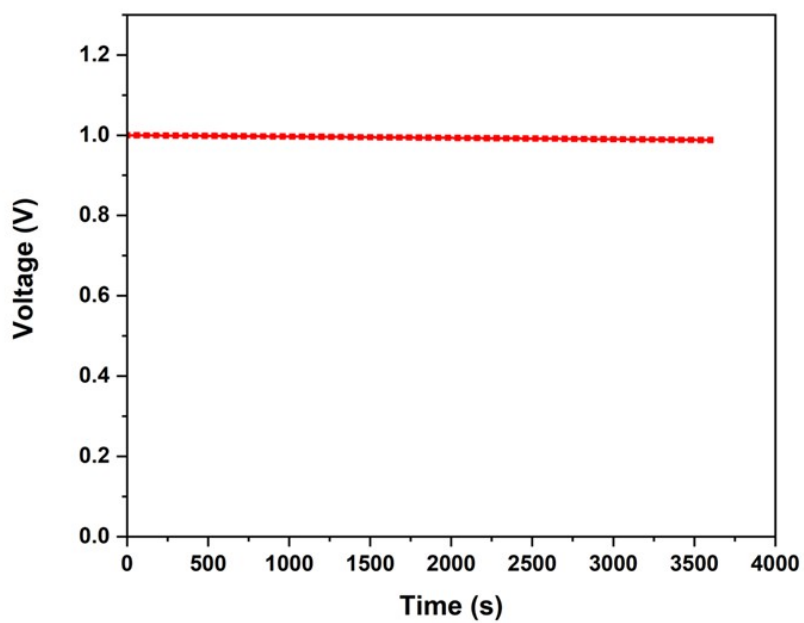

**Fig.S6.** Self discharging for MoO<sub>3</sub>-S1 for 1 h.
